# Supplementary material
Source: publisher figshare collection journal article supplement (https://frontiersin.figshare.com/ndownloader/files/21744855)
Supplement: Supplementary file 1 [file 21744855]

## Sheet: Sheet1
symbol	logFC	entrezID
CLEC4M	-3.93499	10332
CYP2C19	-4.47458	1557
CLEC4G	-4.46152	339390
FCN2	-3.21099	2220
KCNN2	-4.84942	3781
CXCL14	-4.09644	9547
ECM1	-2.73995	1893
CLEC1B	-4.25009	51266
VIPR1	-2.01618	7433
RSPO3	-2.71455	84870
PZP	-4.1892	5858
LYVE1	-2.95988	10894
HHIP	-2.68623	64399
IGFALS	-2.89392	3483
OIT3	-4.29399	170392
CAPN3	-2.87777	825
GPM6A	-2.07173	2823
FITM1	-2.36451	161247
MARCO	-2.57229	8685
FREM2	-2.84688	341640
DOK5	-2.25782	55816
CTNNA3	-2.27273	29119
CRHBP	-4.19525	1393
ASPA	-2.49576	443
FCN3	-4.14147	8547
CYP26A1	-3.78217	1592
PLAC8	-2.78093	51316
CAP2	3.04884	10486
AADAT	-2.752	51166
RACGAP1	3.01723	29127
RRM2	3.47985	6241
CETP	-2.46397	1071
LIFR	-2.42789	3977
CD5L	-2.34473	922
IL13RA2	-2.84911	3598
CNDP1	-5.13394	84735
DIRAS3	-3.08874	9077
NPY1R	-2.26948	4886
LINC01093	-4.39344	100506229
DNASE1L3	-2.88983	1776
ZWINT	2.93845	11130
TUBE1	-2.28334	51175
PLVAP	2.07857	83483
ANGPTL1	-2.04842	9068
ZGPAT	-2.66762	84619
IDO2	-2.67739	169355
TFPI2	-2.36769	7980
KIAA0101	2.34975	NA
KBTBD11	-2.56613	9920
LCAT	-2.67344	3931
PRC1	2.6837	9055
COL15A1	4.07014	1306
ASCL1	-3.71181	429
GSTZ1	-2.43165	2954
NUSAP1	2.5483	51203
SLC16A10	-2.48867	117247
SLC16A4	-2.95358	9122
BCO2	-3.21467	83875
MAGI2-AS3	-2.62639	100505881
CCNB1	2.4989	891
XIST	-5.38784	7503
TMEM27	-3.78843	NA
TP53I3	2.04125	9540
TYMS	2.17195	7298
SLCO4C1	-2.43692	353189
SOCS2	-2.50181	8835
CYP3A43	-2.41573	64816
CYP2B6	-2.86931	1555
ASPM	2.67076	259266
TTC36	-3.46646	143941
FABP5	2.32801	2171
GPR128	-3.09094	NA
HMMR	2.35996	3161
LPA	-3.0857	4018
MT1M	-5.06008	4499
MOGAT2	-2.30624	80168
NDC80	2.43467	10403
SHBG	-2.09802	6462
TOP2A	2.93281	7153
ACSM3	-3.05527	6296
PHGDH	-2.38661	26227
FAM134B	-3.11382	NA
PAIP2B	-2.22755	400961
FOLH1B	-2.61596	219595
KIF20A	2.21293	10112
APOA5	-2.66395	116519
NAT2	-3.0986	10
OLFML3	-2.56269	56944
PBK	2.53518	55872
UBE2T	2.14615	29089
UPP2	-3.21479	151531
OAT	-3.6729	4942
GADD45G	-2.11659	10912
CDKN3	2.54616	1033
MT1F	-3.27996	4494
IL1RAP	-2.01051	3556
EZH2	2.04317	2146
GINS1	2.57846	9837
CDK1	2.34071	983
MFSD2A	-2.43107	84879
S100A8	-2.4513	6279
IL32	2.66823	9235
FAM13A	-2.49608	10144
HAO2	-3.61215	51179
RP11-196G18.24	2.06911	NA
BUB1B	2.07548	701
ANLN	2.32186	54443
SRD5A2	-2.4624	6716
DTL	2.4831	51514
EXPH5	-2.4162	23086
FLVCR1	2.07502	28982
CYP1A2	-3.84234	1544
STEAP4	-2.36634	79689
LY6E	-2.26684	4061
MAN1C1	-2.05808	57134
GLYAT	-2.97624	10249
DLGAP5	2.23144	9787
SLC25A47	-2.90682	283600
FOSB	-2.08015	2354
HBB	-2.08734	3043
FAM83D	2.05056	81610
FAT1	2.36268	2195
FBP1	-2.39049	2203
MT1G	-3.0385	4495
DDX3Y	2.29563	8653
AKR1B10	4.86223	57016
NEK2	2.00673	4751
SLCO1B3	-4.70996	28234
RPS4Y1	3.96963	6192
CXCL12	-2.73547	6387
GLS2	-3.1854	27165
HAMP	-4.35366	57817
AVPR1A	-3.06012	552
ZG16	-2.12025	653808
SRPX	-2.80978	8406
CPED1	-2.07928	79974
CCL20	3.75992	6364
GHR	-2.70942	2690
TTK	2.09402	7272
FLJ22763	-2.3055	NA
KDM5D	2.23742	8284
EFHD1	-2.05472	80303
CYP39A1	-2.56328	51302
EIF1AY	3.00553	9086
MT1E	-2.76508	4493
CYP3A4	-2.95571	1576
APOBEC3B	2.12492	9582
MT1H	-2.68573	4496
TENM1	-2.14602	10178
GPC3	3.87728	2719
RDH16	-2.4295	8608
LGSN	-2.23122	51557
HOGA1	-2.2603	112817
GIPC2	-2.02853	54810
UHRF1	2.21638	29128
MT1HL1	-2.24698	645745
MT1X	-2.64161	4501
CYP2B7P	-2.7009	1556
FXYD1	-2.53649	5348
CXCL2	-2.30508	2920
KMO	-2.28173	8564
BBOX1	-2.99483	8424
CRNDE	2.49616	643911
SLC22A1	-3.7242	6580
APOF	-3.07104	319
GNMT	-2.94312	27232
GBA3	-3.29438	57733
CYP4A11	-2.06448	1579
C5orf27	-2.65898	NA
MT2A	-2.10441	4502
FOS	-2.29279	2353
ACADL	-2.02965	33
LINC00844	-3.80179	100507008
ACSL4	2.7276	2182
ANXA10	-2.3054	11199
CLRN3	-3.19314	119467
CTHRC1	2.96254	115908
CYP2A7	-2.62489	1549
CTH	-2.16997	1491
FGF13	2.31304	2258
PPP1R1A	-2.00568	5502
DNAJC12	-2.14344	56521
XK	2.27221	7504
ROBO1	2.51792	6091
SULT1E1	-2.16004	6783
IGF1	-2.25369	3479
DCN	-2.65068	1634
FKBP1B	2.39486	2281
TRIM16	2.0801	10626
THRSP	-2.97486	7069
LINC01018	-2.27441	255167
LOC344887	2.03942	NA
CYP2C8	-2.44224	1558
ZIC2	2.20466	7546
SPINK1	4.20075	6690
SPP2	-2.14682	6694
CYP2A6	-2.78387	1548
GSPT2	-2.09706	23708
AKR1D1	-2.6281	6718
PRG4	-2.24341	10216
VNN1	-2.6179	8876
LOC100505985	-2.00316	100505985
HGFAC	-2.3154	3083
BHMT	-2.35486	635
CYP1A1	-2.32451	1543
GYS2	-2.6309	2998
BCHE	-2.87054	590
GPX2	2.19944	2877
ADH4	-2.39229	127
CYP8B1	-2.66657	1582
LCN2	2.32986	3934
CNTN3	-2.04321	5067
TDO2	-2.16076	6999
KRT23	2.71477	25984
SLC10A1	-2.1892	6554
UGT3A1	-2.0009	133688
PDZK1IP1	2.10225	10158
C9	-3.5417	735
ERICH5	2.0367	203111
PEG3	-2.02243	5178
FETUB	-2.13803	26998
SPP1	2.73973	6696
NQO1	2.2896	1728
HSD11B1	-2.16169	3290
GPR88	-2.59323	54112
ADH1C	-2.0651	126
CYP2E1	-2.10465	1571
CHI3L1	2.2144	1116
HPGD	-2.05525	3248
UGT2B17	-2.18099	7367
